# Supplementary material
Source: PubMed Central journal article supplement (PMC4863662)
Supplement: mmc1.pdf [file mmc1.pdf]

**The American Journal of Human Genetics, Volume 98**

**Supplemental Data**

**Analyzing Somatic Genome Rearrangements  
in Human Cancers by Using Whole-Exome Sequencing**

**Lixing Yang, Mi-Sook Lee, Hengyu Lu, Doo-Yi Oh, Yeon Jeong Kim, Donghyun Park, Gahee Park, Xiaojia Ren, Christopher A. Bristow, Psalm S. Haseley, Soohyun Lee, Angeliki Pantazi, Raju Kucherlapati, Woong-Yang Park, Kenneth L. Scott, Yoon-La Choi, and Peter J. Park**

## **Table of contents**

**Figure S1.** WES-specific artifacts.

**Figure S2.** Noises in WGS samples.

**Figure S3.** Comparison of somatic rearrangements detected from WES and WGS.

**Figure S4.** Example of an SV detected in WES but not in WGS due to higher coverage of WES.

**Figure S5.** The expression of genes with and without somatic SVs for 14 tumor types.

**Figure S6.** Functional validation for *CEP85L-ROSI* fusion.

**Figure S7.** Functional validation for *RORI-DNAJC6* fusion.

**Figure S8.** Survival plots for breast cancer patients with and without massive rearrangements.

**Figure S9.** Circos plots for nine melanoma patients with massively-rearranged chromosome 22.

**Figure S10.** Comparisons of copy numbers and expressions for *CDK4* and *EGFR* in GBM patients with and without massive rearrangements.

**Table S1.** Sample list for 120 test cases.

**Table S2.** PCR validation.

**Table S3.** All SVs.

**Table S4.** Somatic SVs disrupting tumor suppressors.

**Table S5.** Activating fusions.

**Table S6.** Fusions with 5' house-keeping genes.

**Table S7.** Fusions with 5' chromatin regulators.

**Table S8.** Fusions with 3' chromatin regulators.

**Table S9.** Massive rearrangements details.

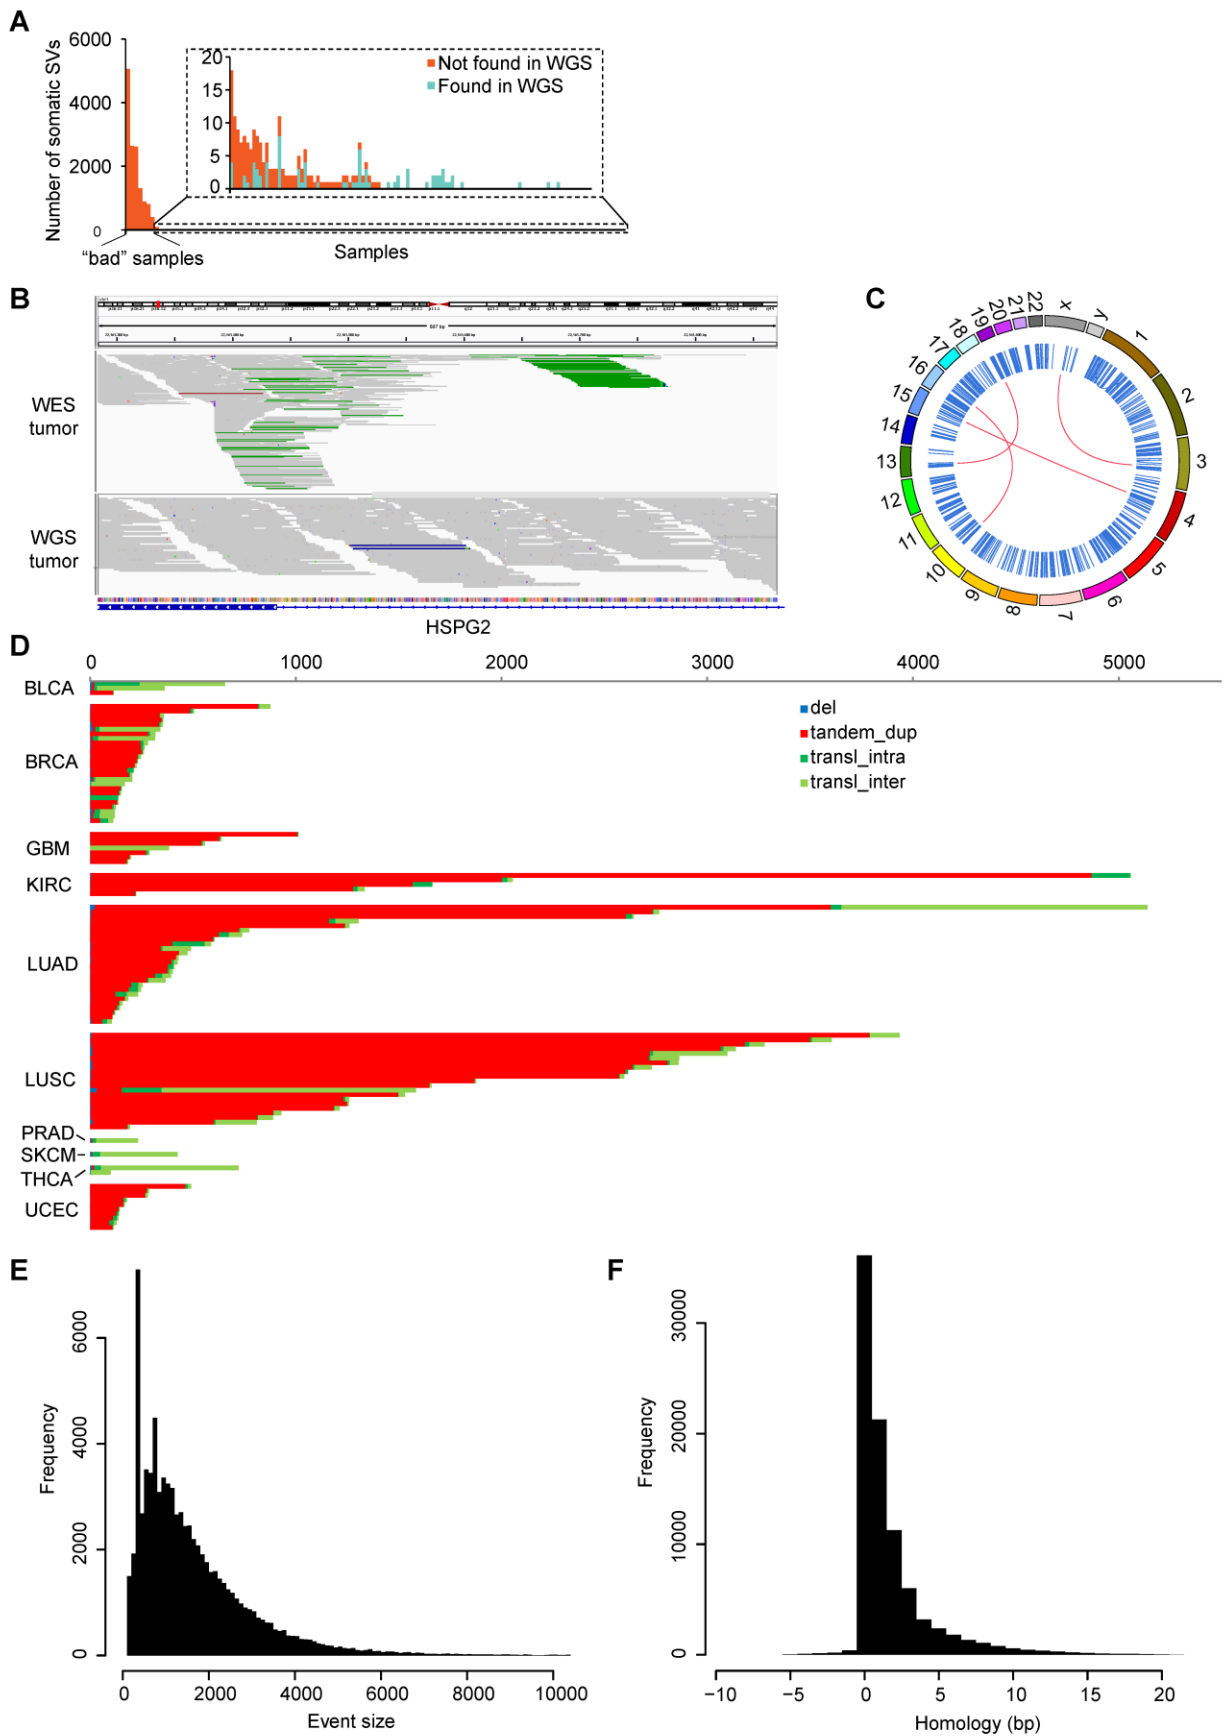

**Figure S1. WES-specific artifacts.** **A**, Comparisons of WES and WGS SV calls. A small number of low-quality samples have an unusually large number of WES-specific somatic SVs. **B**, An IGV screen shot for one artifact. The green lines in the top panel (WES) denote discordant read pairs supporting a tandem duplication; such discordant read pairs are not observed in the bottom panel (WGS data for the same patient). **C**, A Circos plot showing artifacts evenly distributed across all chromosomes. The red lines denote inter-chromosomal events and the blue lines denote intra-chromosomal events. **D**, The number and the type of SVs across a large number of patients, with each horizontal line corresponding to a sample. Artifacts are enriched for tandem duplications. **E** and **F**, Histograms of event size and homology distribution for artifacts, respectively. A negative number for sequence homology corresponds to the size of an insertion.

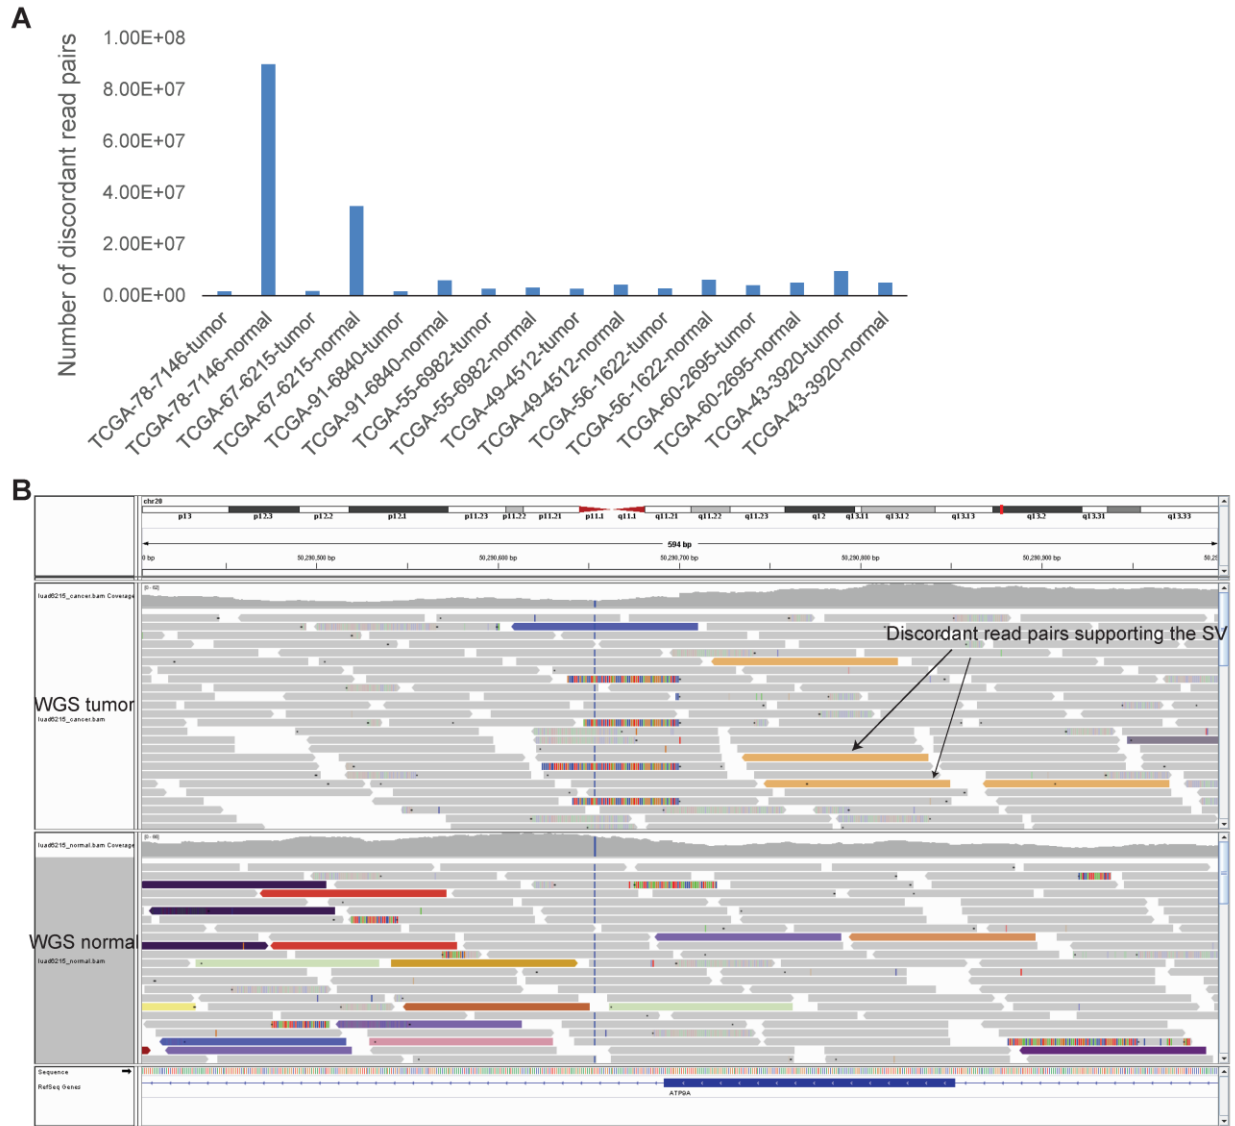

**Figure S2. Noises in WGS samples.** **A**, Number of discordant read pairs in WGS samples. Eight tumor-normal pairs are shown. Some normal samples have excessive discordant read pairs (TCGA-78-7146 and TCGA-67-6215). These discordant pairs are generated from library construction and sequencing, rather than from real SVs in the genome. **B**, The top and bottom panels show the read-level view of WGS tumor and matched normal samples. The orange bars are discordant reads supporting the somatic SV and the bars with different colors in bottom panel are discordant read pairs that the mate are mapped to different chromosomes (chromosomes indicated by color). The event was filtered in WGS because of the many discordant read pairs present in the match normal sample.

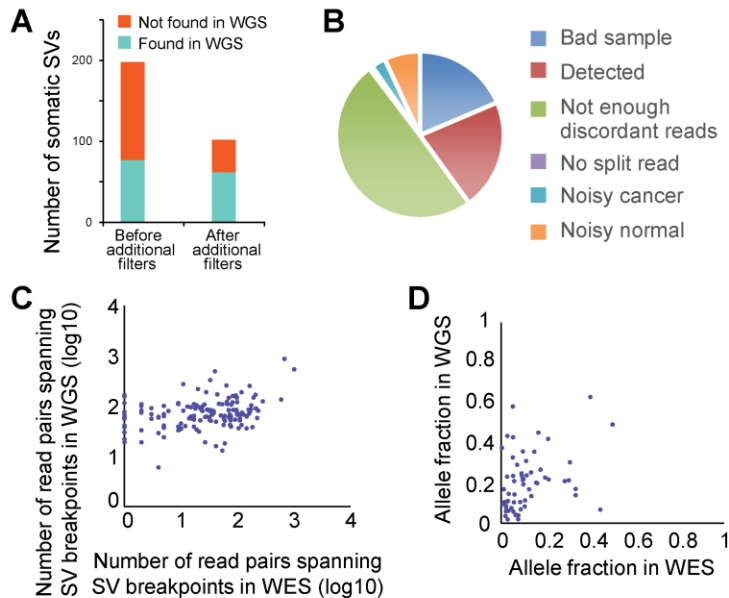

**Figure S3. Comparison of somatic rearrangements detected from WES and WGS. A,** Comparison of somatic rearrangements detected from WES before and after additional filters (with poor-quality samples excluded) shows that the fraction of WES-specific calls is substantially reduced. **B,** The “catchable” somatic SVs detected from WGS data (with breakpoints in exons excluding UTRs). About one-fifth of the SVs are detected by WES but the rest are missed for the reasons listed. “Bad sample” refers to the events being in the sample with >100 somatic SVs detected, and therefore, such sample was subsequently discarded from further analysis. “Noisy cancer” and “Noisy normal” refer to the SVs in which the algorithm did not make a call because of increased noise in the data at the SV location, as reflected in, e.g., aberrant discordant read pairs (see Fig. S2). **C,** Coverage comparison of WES and WGS. The number of read pairs spanning an SV breakpoint in WES and WGS is equivalent to its physical coverage. Each dot is a somatic SV detected from WGS that is also detectable in WES (in exons excluding UTRs). A portion of breakpoints detected in WGS have 10-100x physical coverage in WGS but with <10x coverage in WES. There are also 12 loci with no read pair spanning breakpoint in WES data and are not represented in this plot. **D,** Allele fractions of somatic SVs that are shared by WES and WGS.

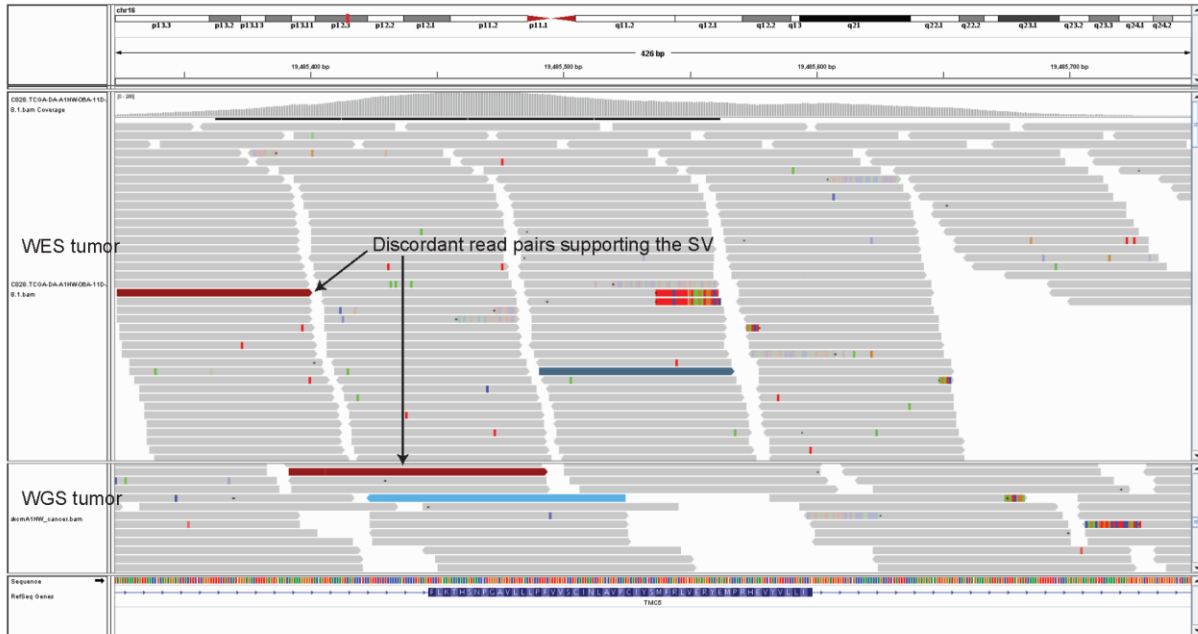

**Figure S4. Example of an SV detected in WES but not in WGS due to higher coverage of WES.** A somatic deletion in melanoma TCGA-DA-A1HW (chr16:19485535-19690623) is detected from WES but not in WGS. The coverage in WES is 300x and there are 4 discordant read pairs (only 1 is displayed). In contrast, the coverage of WGS in the same region is 90x with only 1 discordant read pair present. The event was validated as somatic by PCR.

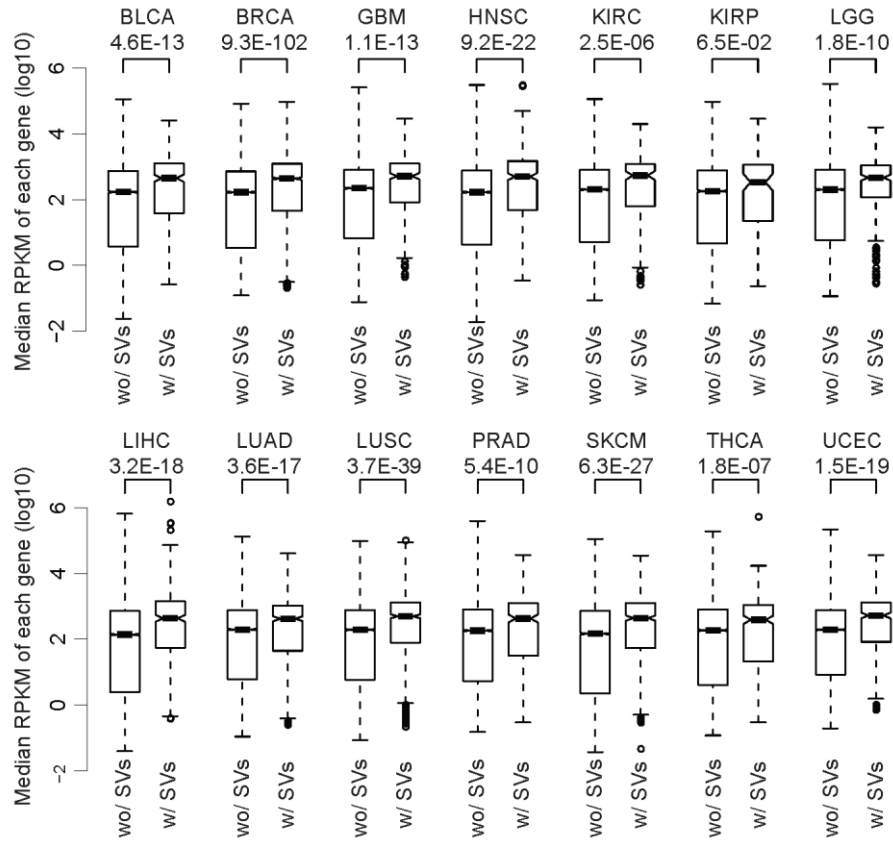

**Figure S5. The expression of genes with and without somatic SVs for 14 tumor types.** The  $P$  values by Wilcoxon one-side rank test are shown below the tumor type names. The median expression level of each gene across all individuals for one tumor type was plotted. This shows somatic SVs occur in relatively highly expressed genes.



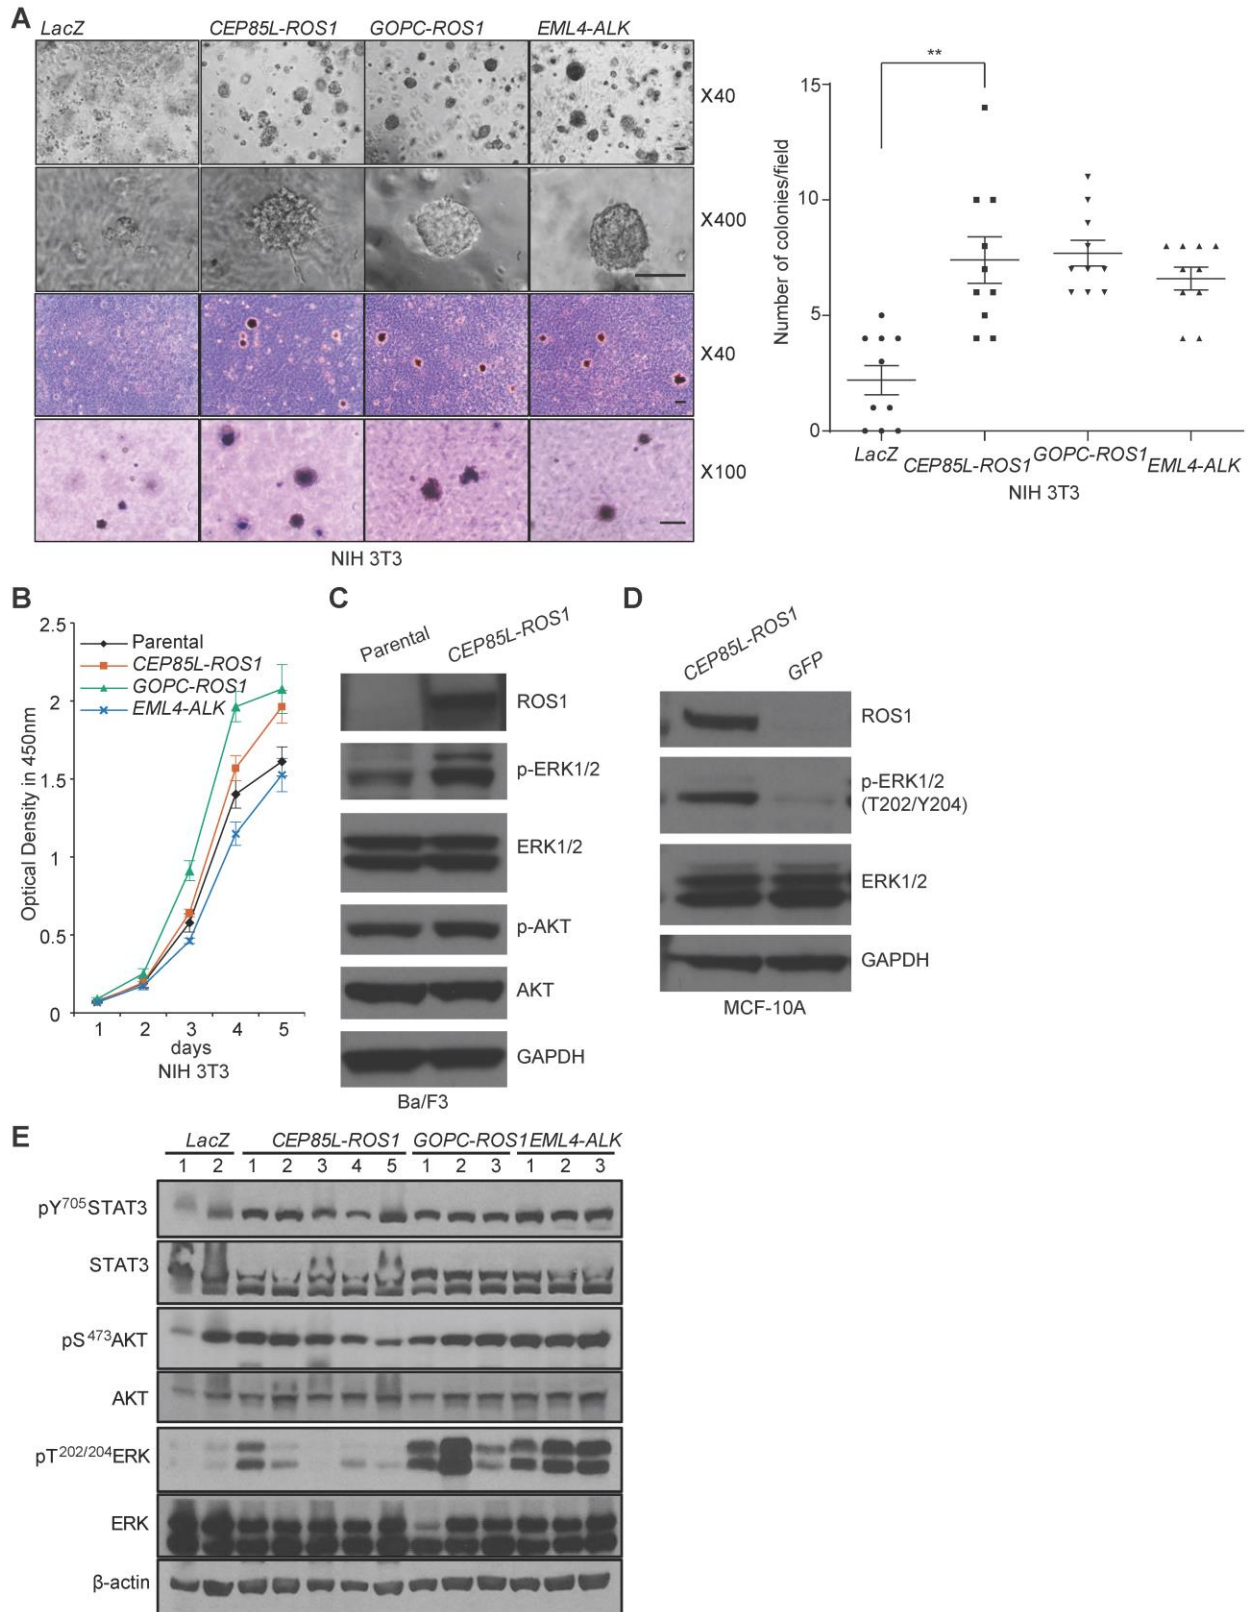

**Figure S6. Functional validation for *CEP85L-ROS1* fusion.** **A**, *In vitro* transforming assay of NIH 3T3 cells. Cells expressing the indicated fusion genes were cultured in Matrigel (upper left panels) for 14 days or soft agar (lower left panels) for 21 days. For visualization, some colonies

were stained with 0.05% crystal violet. Images were taken by a phase-contrast microscope and the colonies were counted at 40X magnification. Scale bar, 50 $\mu$ m. Each dot in the right panel represents total colony number in a unit microscopic field. \*\* denote  $P < 0.01$  with Wilcoxon one-side rank test. **B**, NIH 3T3 cell growth rate. The values represent the average of three determinations, and the error bars indicate standard deviations. **C**, *CEP85L-ROSI* strongly activates ERK1/2 but not AKT in Ba/F3 cell line by western blots. **D**, Immunoblots of *CEP85L-ROSI* expression and MAPK pathway activation in MCF-10A cells. **E**, Activation of Erk and STAT3 but not AKT in solid tumors from nude mice by western blots.

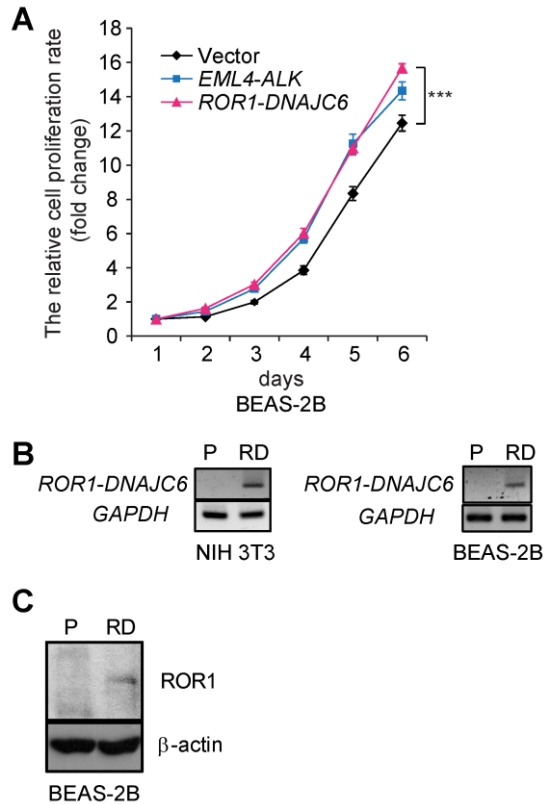

**Figure S7. Functional validation for *ROR1-DNAJC6* fusion.** **A**, Growth rate of BEAS-2B cells expressing *ROR1-DNAJC6* fusion measured by optical density at 450 nm (OD<sub>450</sub>). **B**, Identification of *ROR1-DNAJC6* mRNA expression using RT-PCR in NIH 3T3 and BEAS-2B cells infected with *ROR1-DNAJC6* lentivirus. **C**, Immunoblot using an anti-ROR1 antibody on lysates from the BEAS-2B stable cells expressing *ROR1-DNAJC6* fusion protein.

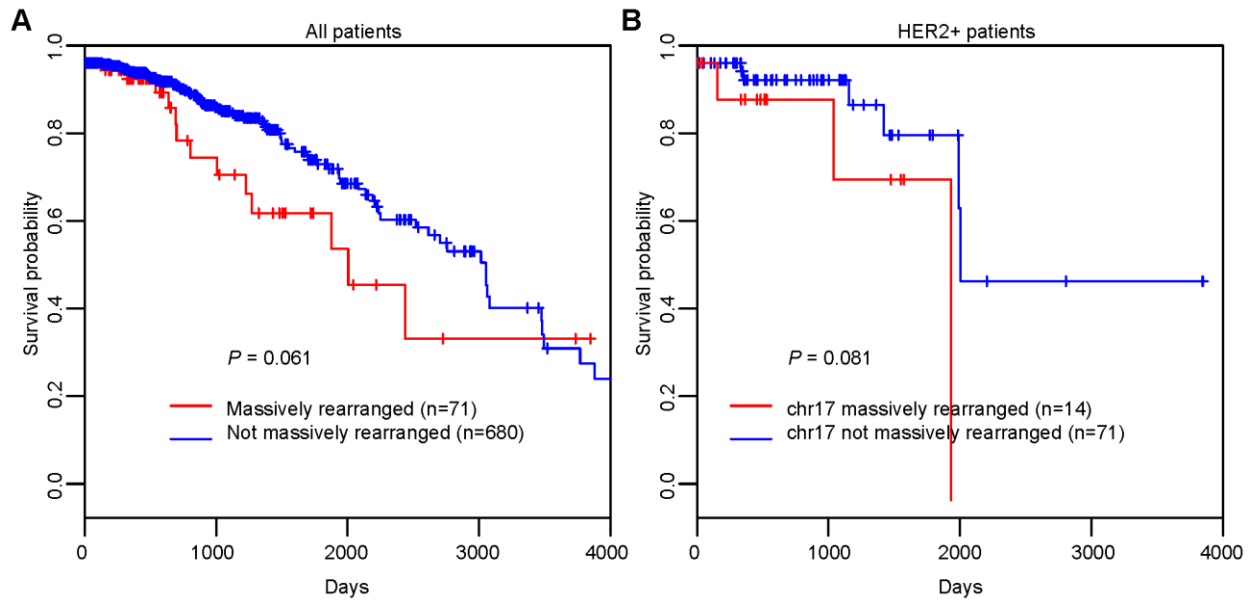

**Figure S8. Survival plots for breast cancer patients with and without massive rearrangements.** **A**, All individuals were divided between those with and without rearrangements. **B**, The HER2+ subgroup was divided between those with and without massively-rearranged chromosome 17. The p-values, computed using the log-rank test, were marginally significant in both cases ( $P = 0.061$  and  $0.081$ , respectively).

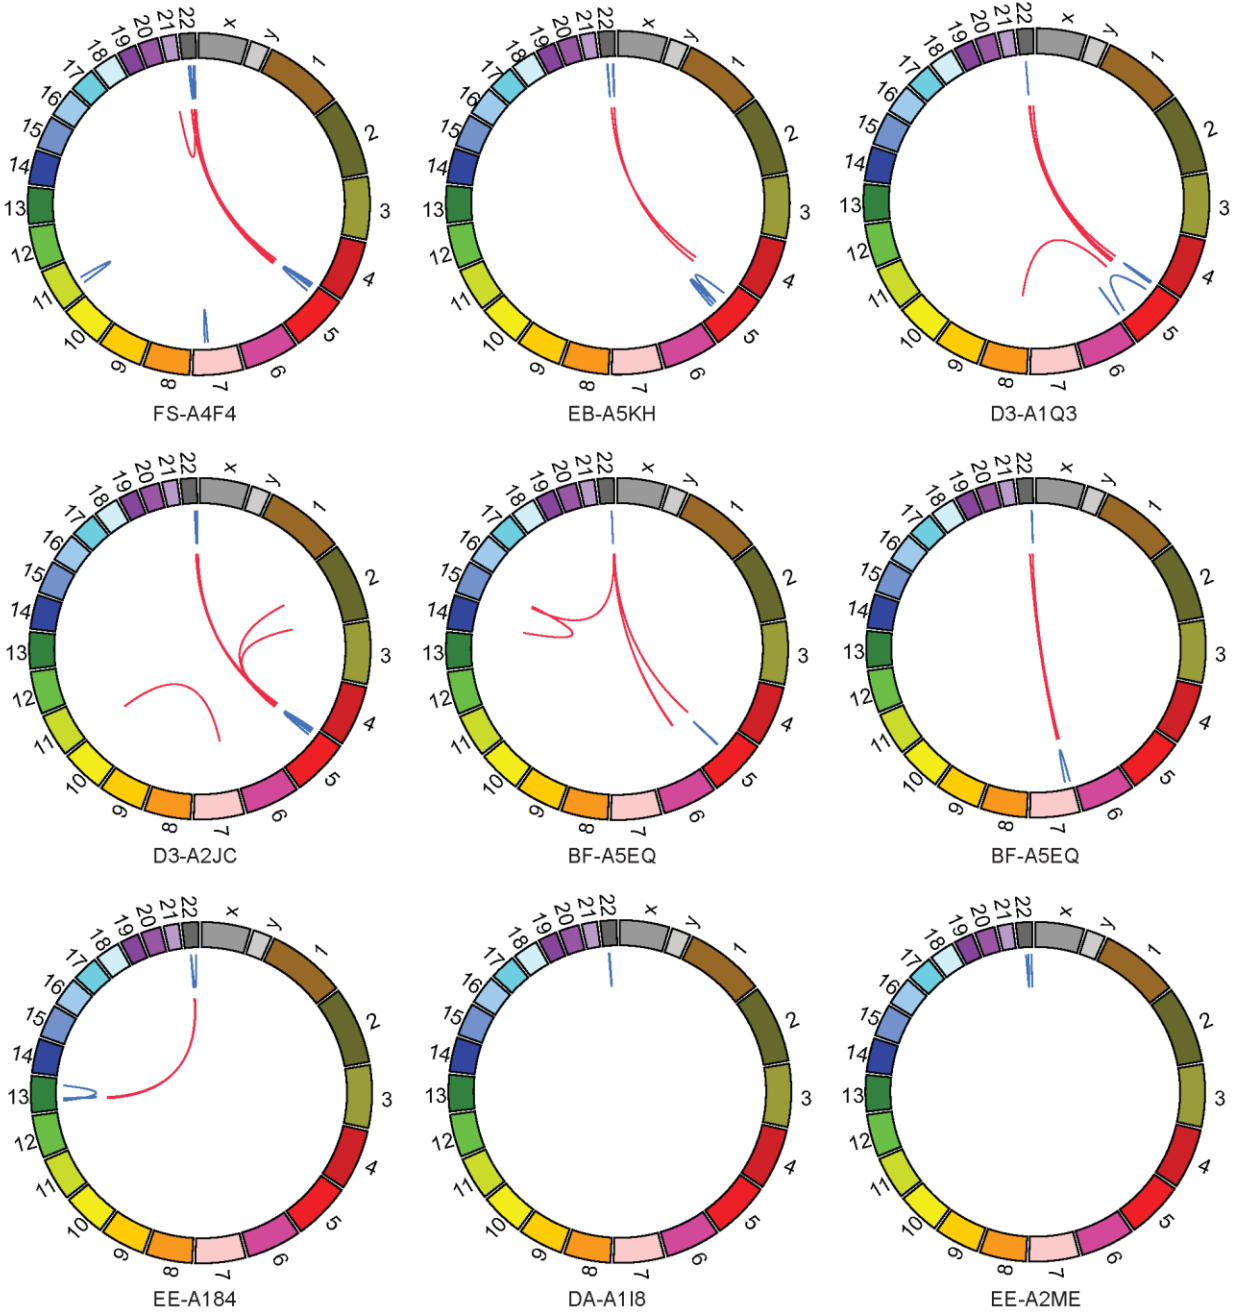

**Figure S9. Circos plots for nine melanoma cases with massive rearranged chromosome 22.** Five of them involve chromosome 5, two involve other chromosomes but not chromosome 5, and two do not involve any other chromosomes.

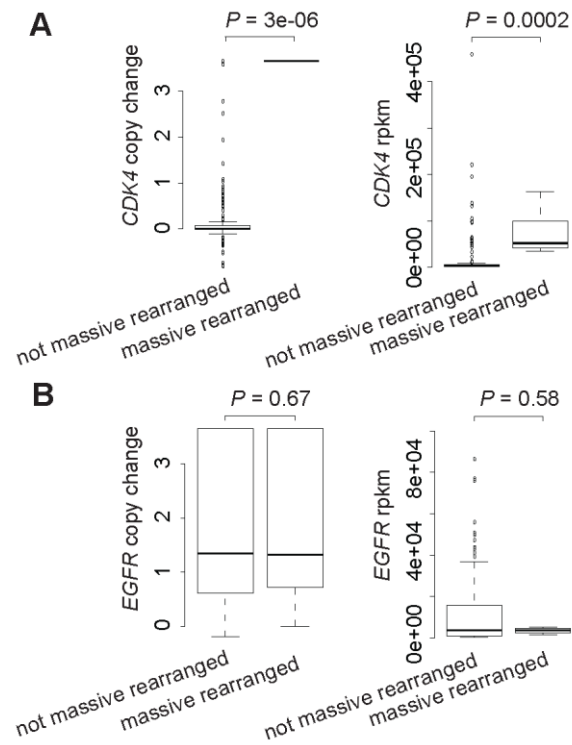

**Figure S10. Comparisons of copy numbers and expressions for *CDK4* and *EGFR* in GBM with and without massive rearrangements. A, *CDK4* (chromosome 12). B, *EGFR* (chromosome 7). Zero in copy change denotes copy neutral and positive number in copy change denotes copy gain. Wilcoxon one-side rank test was used.**

| ID           | chrA | posA      | oriA | geneA   | chrB | posB      | oriB | geneB    | event_type   | disc_pair | split_read | homology | validation |
|--------------|------|-----------|------|---------|------|-----------|------|----------|--------------|-----------|------------|----------|------------|
| SKCM-ER-A19E | 14   | 23532191  | -1   | ACIN1   | 14   | 23683359  | 1    |          | tandem_dup   | 9         | 9          | 2        | 0          |
| SKCM-ER-A19E | 17   | 74082405  | -1   | EXOC7   | 17   | 74154545  | 1    | RNF157   | tandem_dup   | 20        | 21         | 0        | 1          |
| SKCM-DA-A1HW | 16   | 18044955  | 1    |         | 16   | 19548665  | -1   | CP110    | del          | 6         | 2          | 11       | 1          |
| SKCM-DA-A1HW | 16   | 19485535  | 1    | TMC5    | 16   | 19690623  | -1   | C16orf62 | del          | 5         | 5          | 1        | 1          |
| SKCM-DA-A1HW | 11   | 33054030  | 1    | DEPDC7  | 11   | 41760952  | -1   |          | del_ins      | 5         | 5          | -2       | 1          |
| SKCM-DA-A1HW | 15   | 85328052  | -1   | ZNF592  | 15   | 102151414 | -1   |          | invers_r     | 10        | 8          | 1        | 1          |
| SKCM-DA-A1HW | 11   | 36103407  | 1    | LDLRAD3 | 4    | 13111103  | 1    | MAEA     | transl_inter | 6         | 5          | 0        | 1          |
| LUAD-55-6982 | 1    | 142955754 | -1   |         | 12   | 57920445  | -1   | MBD6     | transl_inter | 5         | 22         | -7       | 1          |
| LUAD-55-6982 | 1    | 169347544 | -1   | BLZF1   | 12   | 68432633  | -1   |          | transl_inter | 15        | 11         | 1        | 1          |
| LUAD-44-2659 | 14   | 24084435  | 1    |         | 14   | 39855262  | -1   |          | del          | 14        | 4          | 2        | 1          |
| LUAD-44-2659 | 14   | 33185034  | 1    | AKAP6   | 14   | 39855193  | 1    |          | invers_f     | 4         | 4          | 3        | 1          |
| LUAD-44-2659 | 20   | 39540716  | 1    |         | 20   | 39794027  | 1    | PLCG1    | invers_f     | 6         | 1          | -29      | 1          |
| LUAD-44-2659 | 22   | 39078409  | -1   | TOMM22  | 22   | 39125367  | 1    | GTPBP1   | tandem_dup   | 8         | 7          | 1        | 0          |
| LUAD-44-2659 | 10   | 61068056  | -1   | FAM13C  | 7    | 44294066  | 1    | CAMK2B   | transl_inter | 4         | 4          | -17      | 0          |
| LUAD-05-4396 | 16   | 30392278  | -1   | 1-Sep   | 5    | 154738915 | -1   |          | transl_inter | 4         | 7          | 1        | 1          |
| LUAD-49-4512 | 11   | 65300191  | -1   | SCYL1   | 8    | 56378712  | -1   | XKR4     | transl_inter | 7         | 5          | 0        | 0          |
| LUAD-05-5429 | 17   | 65794643  | -1   |         | 17   | 73230745  | 1    | NUP85    | tandem_dup   | 12        | 5          | 0        | 0          |
| LUAD-05-5429 | 12   | 56493903  | -1   | ERBB3   | 16   | 11917359  | -1   | BCAR4    | transl_inter | 8         | 1          | 0        | 1          |
| LUAD-49-6742 | 19   | 14951975  | -1   | OR7A10  | 19   | 46543671  | -1   | IGFL4    | invers_r     | 12        | 10         | 0        | 1          |
| LUAD-91-6840 | 18   | 71930713  | 1    | CYB5A   | 18   | 71958983  | -1   | CYB5A    | del          | 9         | 1          | 2        | 1          |
| SKCM-ER-A19L | 6    | 80725550  | -1   | TTK     | 6    | 80746118  | -1   | TTK      | invers_r     | 10        | 10         | 2        | 1          |
| SKCM-ER-A19L | 17   | 29284811  | -1   | ADAP2   | 17   | 31226566  | 1    |          | tandem_dup   | 7         | 1          | 0        | 1          |
| SKCM-DA-A1I8 | 22   | 18640545  | 1    | USP18   | 22   | 21445272  | -1   |          | del          | 9         | 9          | 0        | 0          |
| SKCM-DA-A1I8 | 22   | 19740422  | -1   |         | 22   | 21355490  | -1   | THAP7    | invers_r     | 7         | 2          | -20      | 1          |
| SKCM-EB-A24D | 12   | 7048176   | 1    | ATN1    | 12   | 7077799   | -1   | PHB2     | del_ins      | 5         | 4          | -2       | 1          |
| SKCM-EB-A24D | 9    | 128274797 | 1    | MAPKAP1 | 9    | 131356713 | 1    | SPTAN1   | invers_f     | 7         | 10         | 0        | 1          |
| SKCM-EE-A2GT | 6    | 32010309  | 1    | TNXB    | 6    | 35512873  | -1   |          | del          | 7         | 24         | 1        | 1          |

**Table S2. PCR validation.**

| ID           | chrA | posA      | oriA | geneA  | chrB | posB      | oriB | geneB      | event_type   | disc_pair | split_read | homology |
|--------------|------|-----------|------|--------|------|-----------|------|------------|--------------|-----------|------------|----------|
| BLCA-DK-A3IS | 9    | 20173504  | 1    |        | 9    | 21970869  | -1   | CDKN2A     | del          | 4         | 10         | 2        |
| BLCA-K4-A5RJ | 9    | 21852271  | 1    | MTAP   | 9    | 21994341  | -1   | CDKN2A     | del          | 4         | 3          | 3        |
| HNSC-CV-7427 | 9    | 21971883  | 1    | CDKN2A | 9    | 32431704  | -1   | ACO1       | del          | 17        | 25         | 0        |
| HNSC-DQ-5625 | 9    | 21969406  | 1    | CDKN2A | 9    | 22012184  | -1   | CDKN2B-AS1 | del          | 8         | 3          | 9        |
| LUAD-78-7542 | 9    | 21971881  | 1    | CDKN2A | 9    | 22012127  | -1   | CDKN2B-AS1 | del          | 6         | 1          | 0        |
| SKCM-EE-A29H | 9    | 21968345  | 1    | CDKN2A | 9    | 22008169  | -1   | CDKN2B     | del          | 17        | 14         | 0        |
| BRCA-AO-A1KS | 17   | 7468851   | 1    | SENP3  | 17   | 7587689   | 1    | TP53       | invers_f     | 12        | 11         | 3        |
| GBM-06-0237  | 16   | 6261180   | 1    | RBFOX1 | 17   | 7576799   | -1   | TP53       | transl_inter | 16        | 11         | 4        |
| HNSC-CV-7095 | 17   | 7578543   | 1    | TP53   | 17   | 7689076   | -1   | DNAH2      | del          | 14        | 8          | 1        |
| LIHC-BC-A10Y | 17   | 7577216   | 1    | TP53   | 9    | 74887791  | 1    |            | transl_inter | 8         | 9          | 0        |
| PRAD-G9-6329 | 17   | 7481771   | 1    | EIF4A1 | 17   | 7577502   | -1   | TP53       | del          | 9         | 9          | 3        |
| PRAD-HC-A48F | 17   | 5347154   | 1    | DHX33  | 17   | 7578439   | -1   | TP53       | del          | 5         | 4          | 0        |
| PRAD-HC-A48F | 17   | 7578250   | 1    | TP53   | 18   | 66524823  | -1   | CCDC102B   | transl_inter | 8         | 7          | 1        |
| LGG-HT-7873  | 10   | 89717526  | -1   | PTEN   | 6    | 93021957  | -1   |            | transl_inter | 11        | 3          | 0        |
| LUAD-17-Z017 | 10   | 89672707  | -1   | PTEN   | 10   | 129870486 | 1    | PTPRE      | tandem_dup   | 17        | 9          | 0        |
| LUSC-66-2770 | 10   | 89690926  | 1    | PTEN   | 10   | 89717215  | -1   | PTEN       | del          | 19        | 25         | 1        |
| PRAD-EJ-5521 | 10   | 69075557  | 1    | CTNNA3 | 10   | 89690880  | 1    | PTEN       | invers_f     | 5         | 7          | 0        |
| SKCM-BF-A3DN | 10   | 86864700  | -1   |        | 10   | 89624234  | -1   | PTEN       | invers_r     | 9         | 20         | 2        |
| SKCM-ER-A42K | 1    | 242236694 | 1    |        | 10   | 89653956  | 1    | PTEN       | transl_inter | 6         | 4          | 3        |
| STAD-B7-5818 | 10   | 89653739  | -1   | PTEN   | 10   | 89744296  | -1   |            | invers_r     | 20        | 19         | 2        |

**Table S4. Somatic SVs disrupting tumor suppressors.**



| ID                 | chrA | posA      | oriA | geneA   | chrB | posB      | oriB | geneB     | event_type   | disc_pair | split_read | homology |
|--------------------|------|-----------|------|---------|------|-----------|------|-----------|--------------|-----------|------------|----------|
| Cytoskeleton genes |      |           |      |         |      |           |      |           |              |           |            |          |
| THCA-FK-A3SE       | 10   | 61655977  | -1   | CCDC6   | 10   | 43611997  | -1   | RET       | invers_r     | 13        | 17         | 3        |
| THCA-EL-A3ZS       | 10   | 61659539  | -1   | CCDC6   | 10   | 43611930  | -1   | RET       | invers_r     | 4         | 4          | 0        |
| THCA-BJ-A0ZJ       | 10   | 61626050  | -1   | CCDC6   | 10   | 43611953  | -1   | RET       | invers_r     | 13        | 5          | 1        |
| THCA-ET-A3DQ       | 9    | 115932783 | -1   | FKBP15  | 10   | 43610457  | -1   | RET       | transl_inter | 5         | 2          | -3       |
| LUAD-67-6215       | 2    | 42491894  | 1    | EML4    | 2    | 29447037  | 1    | ALK       | invers_f     | 6         | 5          | 2        |
| BRCA-AR-A0TX       | 20   | 55012426  | 1    | CASS4   | 12   | 75712009  | 1    | CAPS2     | transl_inter | 12        | 11         | 0        |
| HNSC-CV-7243       | 5    | 75866511  | 1    | IQGAP2  | 10   | 117242409 | -1   | ATRNL1    | transl_inter | 8         | 7          | 2        |
| BRCA-C8-A12X       | 2    | 204319150 | -1   | RAPH1   | 2    | 234864004 | -1   | TRPM8     | invers_r     | 37        | 20         | 2        |
| LIHC-DD-A3A7       | 22   | 38137110  | 1    | TRIOBP  | 22   | 46643348  | 1    | C22orf40  | invers_f     | 7         | 2          | 8        |
| PRAD-HC-8264       | 12   | 32299559  | 1    | BICD1   | 12   | 66221789  | -1   | HMGA2     | del          | 8         | 7          | 1        |
| KIRC-CJ-4882       | 10   | 102045759 | -1   | BLOC1S2 | 10   | 102232322 | -1   | WNT8B     | invers_r     | 4         | 2          | 3        |
| LIHC-DD-A116       | 19   | 1026749   | 1    | CNN2    | 19   | 992884    | -1   | WDR18     | tandem_dup   | 17        | 36         | 1        |
| LUAD-97-A4M1       | 5    | 629160    | 1    | CEP72   | 5    | 6748341   | -1   | PAPD7     | del_ins      | 9         | 8          | -1       |
| PRAD-HC-8262       | 1    | 156302064 | -1   | CCT3    | 1    | 155823591 | 1    | GON4L     | del          | 4         | 2          | 0        |
| BRCA-PE-A5DC       | 11   | 70279907  | 1    | CTTN    | 11   | 71943775  | -1   | INPPL1    | del          | 50        | 42         | 0        |
| BRCA-AR-A1AH       | 3    | 196989153 | -1   | DLG1    | 3    | 197792772 | 1    | LOC348840 | tandem_dup   | 19        | 15         | 4        |
| LUAD-49-4490       | 18   | 5479153   | -1   | EPB41L3 | 22   | 41282396  | -1   | XPNPEP3   | transl_inter | 7         | 4          | 2        |
| BRCA-B6-A011       | 19   | 12963954  | 1    | MAST1   | 11   | 65033937  | -1   | POLA2     | transl_inter | 5         | 5          | 5        |
| BLCA-DK-A1A7       | 17   | 30963585  | -1   | MYO1D   | 17   | 32116519  | 1    | ACCN1     | tandem_dup   | 5         | 1          | 0        |
| KIRP-P4-A5EB       | 5    | 58682616  | -1   | PDE4D   | 5    | 65029155  | -1   | NLN       | invers_r     | 6         | 6          | 0        |
| LUAD-69-7980       | X    | 50446818  | -1   | SHROOM4 | X    | 45013382  | 1    | CXorf36   | del          | 5         | 9          | 2        |
| SKCM-EB-A3XF       | 22   | 31485928  | 1    | SMTN    | 3    | 49700916  | -1   | BSN       | transl_inter | 4         | 2          | 6        |
| BRCA-A2-A3Y0       | 11   | 66453566  | -1   | SPTBN2  | 11   | 69517170  | 1    | FGF19     | tandem_dup   | 4         | 3          | 1        |
| BRCA-E9-A1NF       | 15   | 99670591  | 1    | SYNM    | 15   | 99535129  | 1    | PGPEP1L   | invers_f     | 8         | 6          | 0        |
| KIRP-GL-7966       | 16   | 2120616   | 1    | TSC2    | 16   | 2041973   | -1   | SYNGR3    | tandem_dup   | 4         | 5          | 2        |
| BRCA-BH-A18K       | 19   | 22825352  | 1    | ZNF492  | 19   | 56549328  | -1   | NLRP5     | del_ins      | 22        | 38         | -5       |
| Biosynthesis genes |      |           |      |         |      |           |      |           |              |           |            |          |
| BRCA-C8-A12V       | 1    | 27060158  | 1    | ARID1A  | 1    | 155172955 | 1    | THBS3     | invers_f     | 6         | 4          | -4       |
| LGG-DH-5140        | 22   | 38373695  | -1   | SOX10   | 11   | 73130191  | 1    | FAM168A   | transl_inter | 7         | 4          | 0        |

|              |    |           |    |         |    |           |    |          |              |    |    |     |
|--------------|----|-----------|----|---------|----|-----------|----|----------|--------------|----|----|-----|
| LUSC-43-A475 | 6  | 42023974  | 1  | TAF8    | 6  | 110764199 | 1  | SLC22A16 | invers_f     | 19 | 12 | -1  |
| KIRC-CJ-4882 | 10 | 102045759 | -1 | BLOC1S2 | 10 | 102232322 | -1 | WNT8B    | invers_r     | 4  | 2  | 3   |
| BRCA-AQ-A54N | 12 | 121693336 | -1 | CAMKK2  | 12 | 121882684 | 1  | KDM2B    | tandem_dup   | 19 | 34 | 4   |
| BRCA-AR-A24W | X  | 40541858  | -1 | MED14   | X  | 133102817 | 1  | GPC3     | tandem_dup   | 4  | 6  | 1   |
| LUSC-NC-A5HL | 5  | 176700705 | 1  | NSD1    | 5  | 176452827 | -1 | ZNF346   | tandem_dup   | 8  | 8  | -1  |
| BRCA-C8-A278 | 1  | 164786924 | 1  | PBX1    | 1  | 156354277 | -1 | RHBG     | tandem_dup   | 8  | 1  | -11 |
| BRCA-A1-A0SK | 6  | 43141951  | 1  | SRF     | 1  | 169484431 | 1  | F5       | transl_inter | 23 | 13 | 1   |
| LGG-IK-7675  | 9  | 32544233  | -1 | TOPORS  | 9  | 18824908  | -1 | ADAMTSL1 | invers_r     | 4  | 5  | 2   |
| LUAD-55-8615 | 2  | 85535039  | 1  | TCF7L1  | 14 | 36340716  | -1 | BRMS1L   | transl_inter | 6  | 7  | 4   |
| KIRP-J7-8537 | X  | 48897474  | -1 | TFE3    | 17 | 7132983   | 1  | DVL2     | transl_inter | 23 | 14 | 1   |
| LUSC-L3-A524 | 6  | 43752524  | 1  | VEGFA   | 6  | 43571575  | -1 | POLH     | tandem_dup   | 4  | 2  | -19 |

**Table S6. 5' fusion partners of activating fusions enriched in house-keeping genes.**

| ID           | chrA | posA      | oriA | geneA  | chrB | posB      | oriB | geneB   | event_type   | disc_pair | split_read | homology |
|--------------|------|-----------|------|--------|------|-----------|------|---------|--------------|-----------|------------|----------|
| BRCA-AR-A1AY | 11   | 66919403  | 1    | KDM2A  | 11   | 67200591  | -1   | RPS6KB2 | del          | 4         | 2          | 1        |
| BRCA-A7-A13D | 17   | 7755424   | 1    | KDM6B  | 17   | 7259504   | -1   | TMEM95  | tandem_dup   | 18        | 6          | -2       |
| BRCA-C8-A12V | 1    | 27060158  | 1    | ARID1A | 1    | 155172955 | 1    | THBS3   | invers_f     | 6         | 4          | -4       |
| BRCA-BH-A18H | 7    | 151962195 | -1   | MLL3   | X    | 44098470  | 1    | EFHC2   | transl_inter | 17        | 22         | 2        |
| GBM-06-5856  | 12   | 121916361 | -1   | KDM2B  | 7    | 54825303  | 1    | SEC61G  | transl_inter | 11        | 11         | -15      |
| PRAD-EJ-8469 | X    | 44918730  | 1    | KDM6A  | X    | 11418883  | 1    | ARHGAP6 | invers_f     | 9         | 8          | -3       |
| LUSC-NC-A5HL | 5    | 176700705 | 1    | NSD1   | 5    | 176452827 | -1   | ZNF346  | tandem_dup   | 8         | 8          | -1       |
| LUSC-34-5928 | 17   | 30293540  | 1    | SUZ12  | 17   | 30349632  | -1   | LRRC37B | del          | 4         | 19         | 1        |

**Table S7. 5' fusion partners of activating fusions enriched in chromatin regulators.**

| ID           | chrA | posA      | oriA | geneA   | chrB | posB      | oriB | geneB    | event_type   | disc_pair | split_read | homology |
|--------------|------|-----------|------|---------|------|-----------|------|----------|--------------|-----------|------------|----------|
| BRCA-AR-A0U3 | 11   | 68777066  | -1   | MRGPRF  | 11   | 66949518  | -1   | KDM2A    | invers_r     | 5         | 3          | 1        |
| BRCA-AQ-A54N | 12   | 121693336 | -1   | CAMKK2  | 12   | 121882684 | 1    | KDM2B    | tandem_dup   | 19        | 34         | 4        |
| BRCA-OL-A5D7 | 19   | 1219348   | 1    | STK11   | 19   | 5024719   | -1   | KDM4B    | del_ins      | 6         | 7          | -2       |
| BRCA-AR-A0TT | 1    | 155058733 | 1    | EFNA3   | 1    | 161129991 | -1   | USP21    | del_ins      | 15        | 1          | -1       |
| BRCA-AR-A250 | 17   | 59370199  | 1    | BCAS3   | 17   | 47889001  | -1   | MYST2    | tandem_dup   | 12        | 15         | 3        |
| BRCA-BH-A1EN | 17   | 37343318  | -1   | CACNB1  | 11   | 76201326  | -1   | C11orf30 | transl_inter | 8         | 11         | 0        |
| BLCA-DK-A6AV | 12   | 56641865  | -1   | ANKRD52 | 12   | 56562982  | 1    | SMARCC2  | del          | 15        | 9          | 5        |

**Table S8. 3' fusion partners of activating fusions enriched in chromatin regulators.**
